# Supplementary material for: GOPred: GO Molecular Function Prediction by Combined Classifiers
Source: PubMed Central journal article supplement (PMC2930845; doi:10.1371/journal.pone.0012382), 2010-08-31

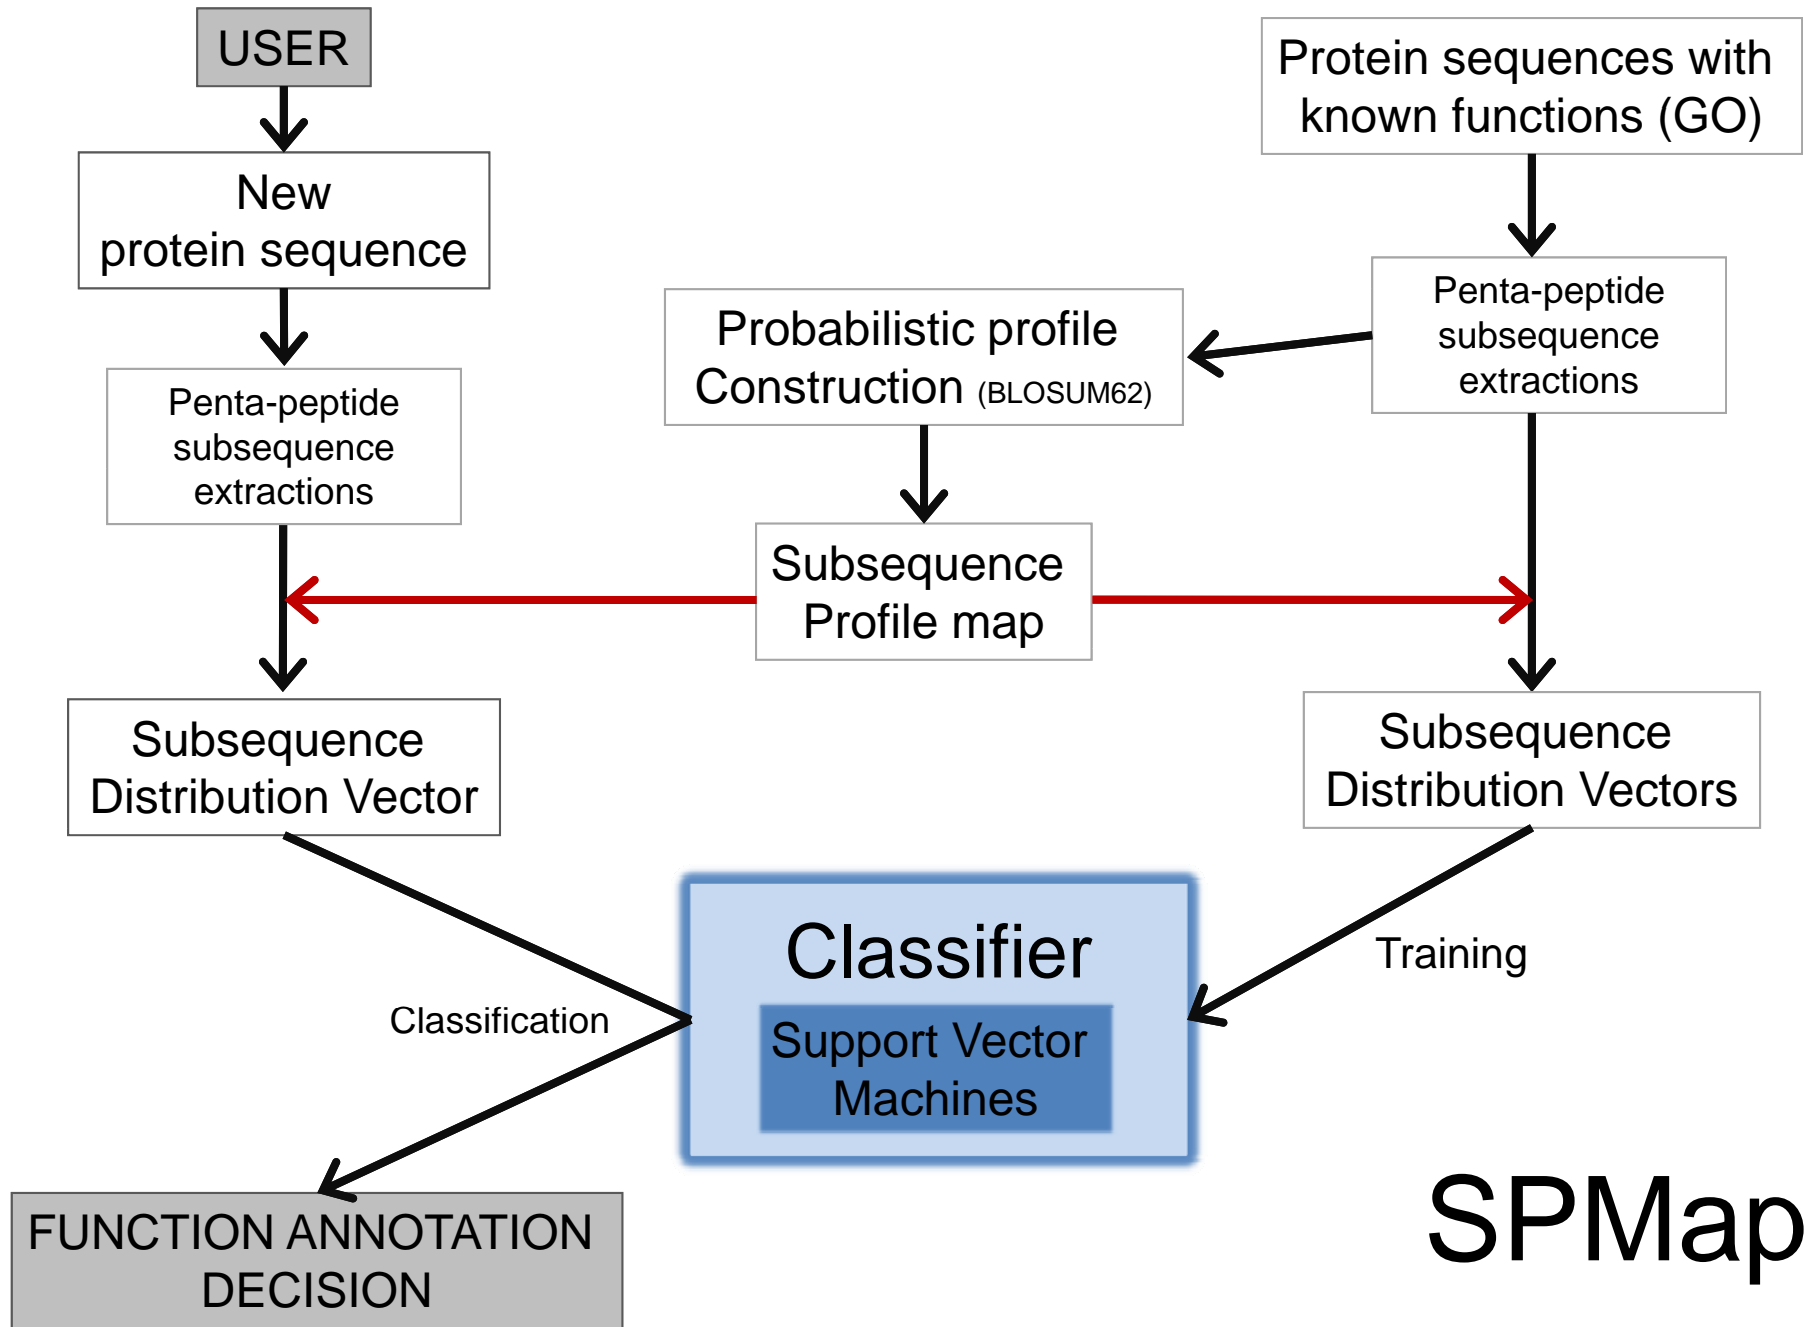

Supplement: pone.0012382.s001.pdf [file pone.0012382.s001.pdf]
